# Supplementary material
Source: Springer Nature journal article supplement (https://www.springermedizin.de/resource/supplementary/12916_2013_981_MOESM7_ESM.pdf/9598756)
Supplement: MOESM7 [file 9598756]

**Supplementary Table 7:** Differential mRNA expression ( $q < 0.05$ ) of candidate genes for type 2 diabetes (T2D) related traits in human pancreatic islets exposed to palmitate versus control. DNA methylation data is displayed if the absolute difference in DNA methylation  $\geq 3\%$  and  $P < 0.05$ .

| T2D trait candidate gene | Trait*           | mRNA expression |     |                       |                         |                          |         |         | DNA methylation (%) |                   |                       |                         |                          |         |
|--------------------------|------------------|-----------------|-----|-----------------------|-------------------------|--------------------------|---------|---------|---------------------|-------------------|-----------------------|-------------------------|--------------------------|---------|
|                          |                  | Probe ID        | Chr | Control mean $\pm$ sd | Palmitate mean $\pm$ sd | Diff. palmitate -control | P-value | q-value | Probe ID            | Region            | Control mean $\pm$ sd | Palmitate mean $\pm$ sd | Diff. palmitate -control | P-value |
| ATP11A                   | 1                | 7970162         | 13  | 184.9 $\pm$ 37.8      | 153.7 $\pm$ 35.7        | 31.2                     | 0.0017  | 0.033   | cg02738374          | Body; Island      | 80.0 $\pm$ 3.7        | 83.4 $\pm$ 2.7          | 3.4                      | 0.001   |
|                          |                  |                 |     |                       |                         |                          |         |         | cg19293163          | Body; N Shore     | 63.9 $\pm$ 7.4        | 68.4 $\pm$ 5.6          | 4.5                      | 0.005   |
| FADS1                    | 2, 3             | 7948612         | 11  | 396.9 $\pm$ 102.4     | 588.2 $\pm$ 187.9       | -191.3                   | 0.00024 | 0.013   |                     |                   |                       |                         |                          |         |
| FOXA2                    | 3                | 8065344         | 20  | 320.9 $\pm$ 47.1      | 353.7 $\pm$ 54.1        | -32.8                    | 0.0024  | 0.041   |                     |                   |                       |                         |                          |         |
| GCKR                     | 2, 3, 4, 5, 6    | 8040960         | 2   | 80.8 $\pm$ 32.2       | 104.2 $\pm$ 65.0        | -23.4                    | 0.0012  | 0.027   | cg20229788          | TSS1500; S Shore  | 24.3 $\pm$ 6.3        | 27.4 $\pm$ 5.9          | 3.1                      | 0.013   |
| GLIS3                    | 2, 3             | 8159900         | 9   | 441.4 $\pm$ 66.2      | 394.9 $\pm$ 47.8        | 46.5                     | 0.0012  | 0.027   | cg14641122          | Body; Open sea    | 33.4 $\pm$ 8.2        | 36.7 $\pm$ 9.3          | 3.2                      | 0.010   |
|                          |                  |                 |     |                       |                         |                          |         |         | cg14269813          | Body; Open sea    | 58.2 $\pm$ 11.1       | 61.6 $\pm$ 11.3         | 3.4                      | 0.016   |
| GRB14                    | 5                | 8056327         | 2   | 97.5 $\pm$ 15.5       | 81.5 $\pm$ 24.1         | 16.0                     | 0.0024  | 0.041   |                     |                   |                       |                         |                          |         |
| HK1                      | 1                | 7928019         | 10  | 169.7 $\pm$ 43.7      | 150.4 $\pm$ 43.5        | 19.3                     | 0.0024  | 0.041   | cg04031454          | TSS1500; Open sea | 65.9 $\pm$ 4.4        | 69.1 $\pm$ 4.2          | 3.2                      | 0.004   |
| PCSK1                    | 3                | 8113234         | 5   | 4,238.9 $\pm$ 1,705.4 | 5,381.2 $\pm$ 1,765.8   | -1,142.3                 | 0.0002  | 0.013   |                     |                   |                       |                         |                          |         |
| PROX1                    | 2, 3             | 7909681         | 1   | 153.2 $\pm$ 26.4      | 131.9 $\pm$ 26.7        | 21.3                     | 0.00024 | 0.013   |                     |                   |                       |                         |                          |         |
| SEZ6L                    | 7                | 8072088         | 22  | 344.9 $\pm$ 136.9     | 407.1 $\pm$ 174.6       | -62.2                    | 0.0017  | 0.033   |                     |                   |                       |                         |                          |         |
| SLC30A8                  | 2, 3, 1, 8       | 8148003         | 8   | 5,399.1 $\pm$ 1,886.6 | 4,762.5 $\pm$ 1,777.0   | 636.6                    | 0.0034  | 0.049   |                     |                   |                       |                         |                          |         |
| TCF7L2                   | 2, 3, 5, 1, 8, 9 | 7930537         | 10  | 215.1 $\pm$ 30.9      | 180.2 $\pm$ 28.9        | 34.9                     | 0.00024 | 0.013   | cg26775558          | Body; Open sea    | 56.5 $\pm$ 10.0       | 60.4 $\pm$ 9.2          | 3.9                      | 0.006   |
| TMPRSS6                  | 1                | 8075865         | 22  | 52.4 $\pm$ 5.6        | 59.0 $\pm$ 9.0          | -6.6                     | 0.00073 | 0.020   |                     |                   |                       |                         |                          |         |

\*1) Glycated hemoglobin levels, 2) Fasting glucose-related traits, 3) Fasting glucose-related traits (interaction with BMI), 4) Fasting insulin-related traits, 5) Fasting insulin-related traits (interaction with BMI), 6) Fasting plasma glucose, 7) Insulin resistance/response, 8) Type 2 diabetes and other traits, 9) Two-hour glucose challenge
